# Supplementary material
Source: publisher site journal article supplement (https://www.dovepress.com/article/236162)
Supplement: Supplementary file 1 [file get_supplementary_file.php]

**Supplementary Material**

| *Gene* | | *Forward primer (5’-3’)* | *Reverse primer (5’-3’)* |
| --- | --- | --- | --- |
| *Hsa_circ_0011780* | CATCACAGATCTTCTTGGCCA | | ACTCGGCTTTGGTATTCTTGC |
| *miR-544a* | TAAAAGCTGGCAACTGTCTAA | | ATTAGTAGGAAATTGCTGCAG |
| *negative control* | UUUGUACUACACAAAAGUACUG | | CAGUACUUUUGUGUAGUACAAA |
| *GAPDH* | CCCTTCATTGACCTCAACTACA | | ATGACAAGCTTCCCGTTCTC |

**Supplemental Table I. The primers for genes detected by real-time PCR**
